# Supplementary material for: Distinct growth hormone receptor signaling modes regulate skeletal muscle development and insulin sensitivity in mice
Source: JCI journal article supplement (doi:10.1172/jci42447), 2010-10-01
Supplement: sd1 [file 1]

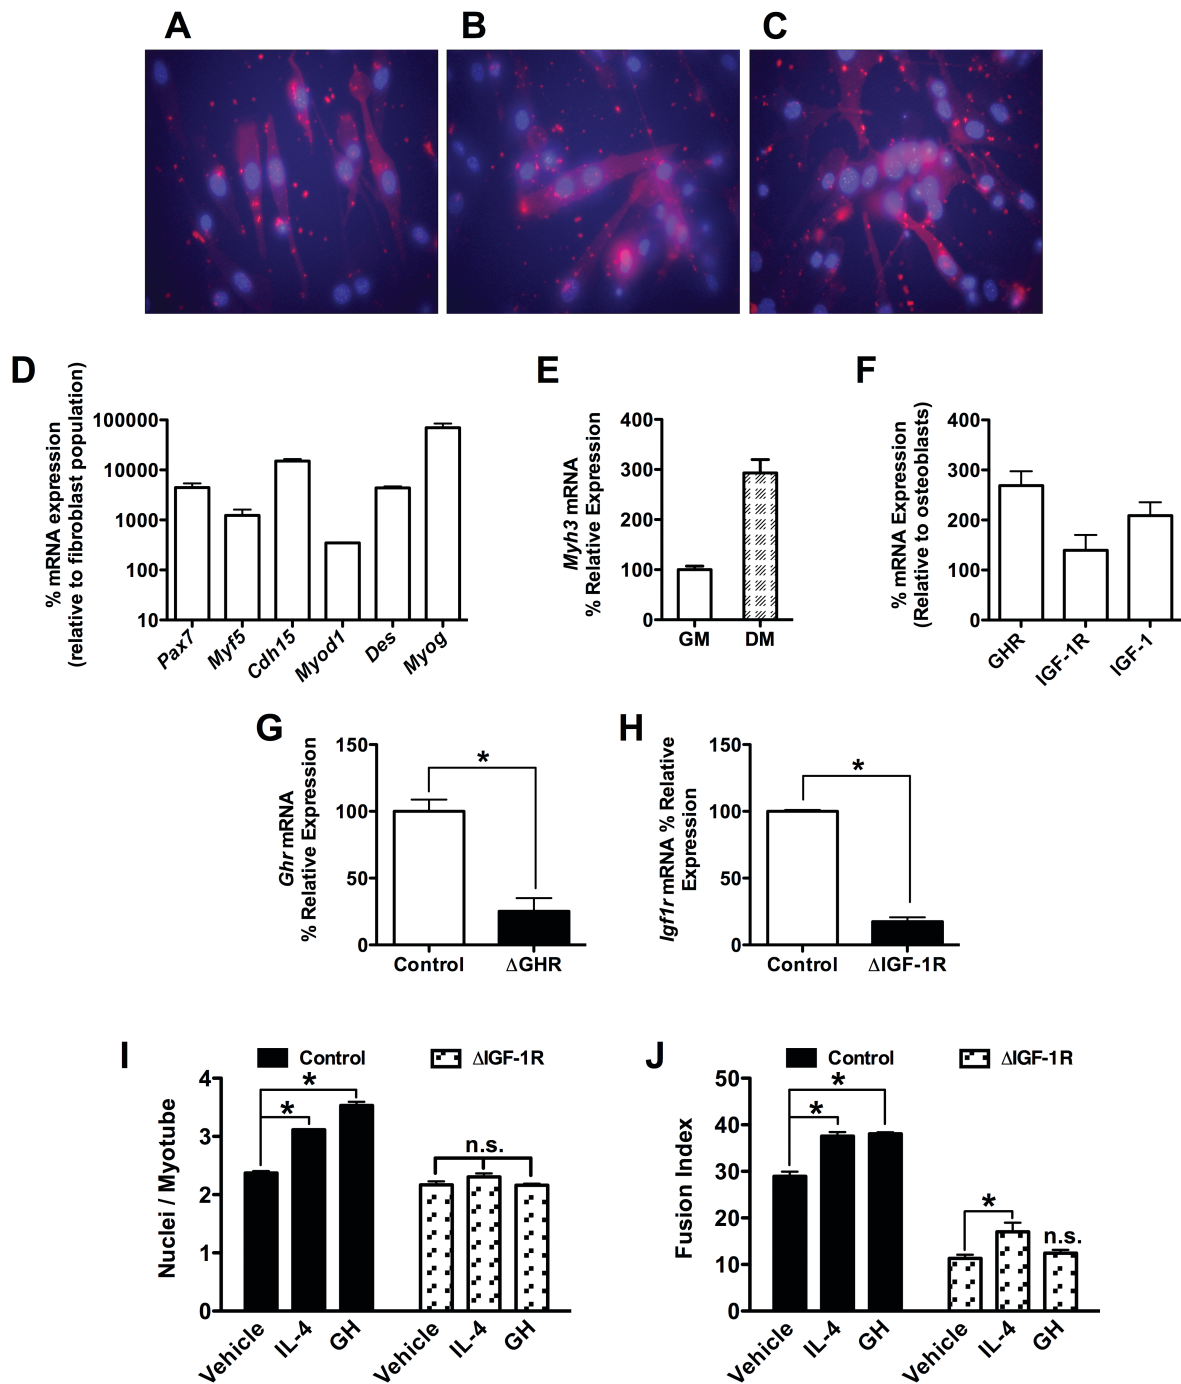

**Supplemental Figure 1: Validation of in vitro primary myoblast system and in vitro adenoviral Cre-mediated gene deletion.** Myoblasts were isolated from the gastrocnemius muscles of wild type mice and induced to differentiate for 48 hours. Myoblasts stained with Dil and Dapi at (A) 0 hours, (B) 24 hours or (C) 48 hours of differentiation. (D) Real-time PCR was performed using primers for the indicated muscle-specific genes on mRNA harvested from parallel cultures of myoblasts at 0 hours. (E) Real-time PCR was performed on mRNA harvested from parallel 48 hour cultures using primers for *Myh3*, and (F) components of the GH/IGF-1 axis. (G and H) All in vitro studies were performed following confirmation of receptor deletion, as described in the Methods, which was routinely >80%. (I and J) Myoblasts carrying floxed IGF-1R alleles were infected as above (adenoGFP – control and adenoCre – ΔIGF-1R) and induced to differentiate in media supplemented with vehicle, IL-4 or GH for 48 hours before assessment of number of nuclei per myotube (I) or fusion index (J). All data shown is representative of at least three separate experiments performed from separate muscle cell preparations. Error bars indicate S.E.M. \* $p < 0.05$

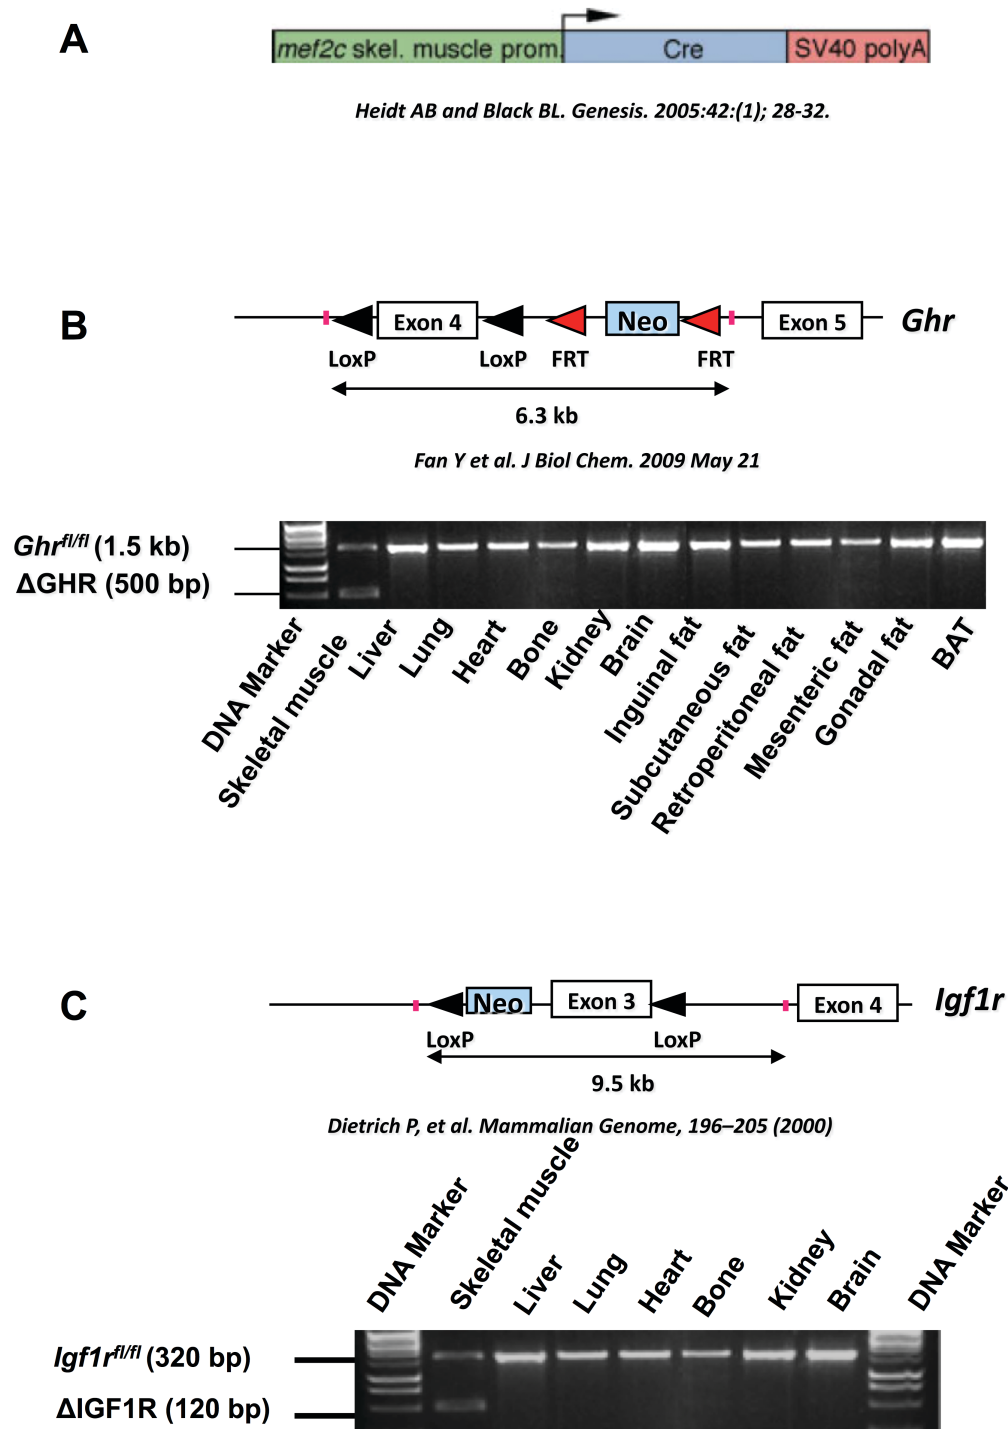

**Supplemental Figure 2: Cre-LoxP strategy for muscle-targeted deletion of GHR and IGF-1R.** (A) Schematic diagram of the transgenic Cre mouse under the control of *Mef2c* skeletal muscle promoter. (B) Schematic diagram of floxed *Ghr* allele and allele specific PCR performed on the DNA of tissues harvested from  $\Delta$ GHR mice indicating deletion is restricted to skeletal muscle. (C) Schematic diagram of floxed *Igf1r* allele and allele specific PCR performed on the DNA of tissues harvested from  $\Delta$ IGF-1R mice indicating deletion is restricted to skeletal muscle. Allele specific PCR blots are representative of 3 control and 3 knockout animals tested.

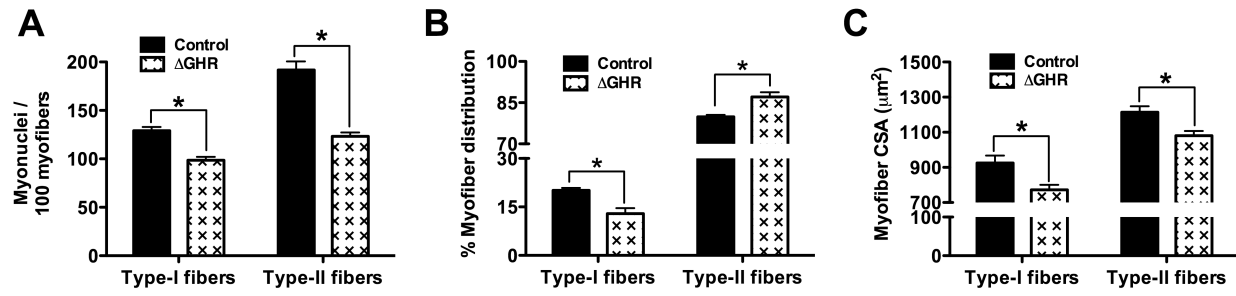

**Supplemental Figure 3: Histomorphometric analysis of gastrocnemius muscles from 26 week old control and ΔGHR mice. (A) Myonuclei/100 myofibers, (B) percent myofiber distribution and (C) myofiber diameter (CSA). (n=6 for control and ΔGHR). Error bars indicate S.E.M. \* $p < 0.05$**
